# Supplementary material
Source: publisher figshare collection journal article supplement (https://gsajournals.figshare.com/articles/dataset/_/9782801)
Supplement: Supplementary file 1 [file 1]

**Figure S1.**

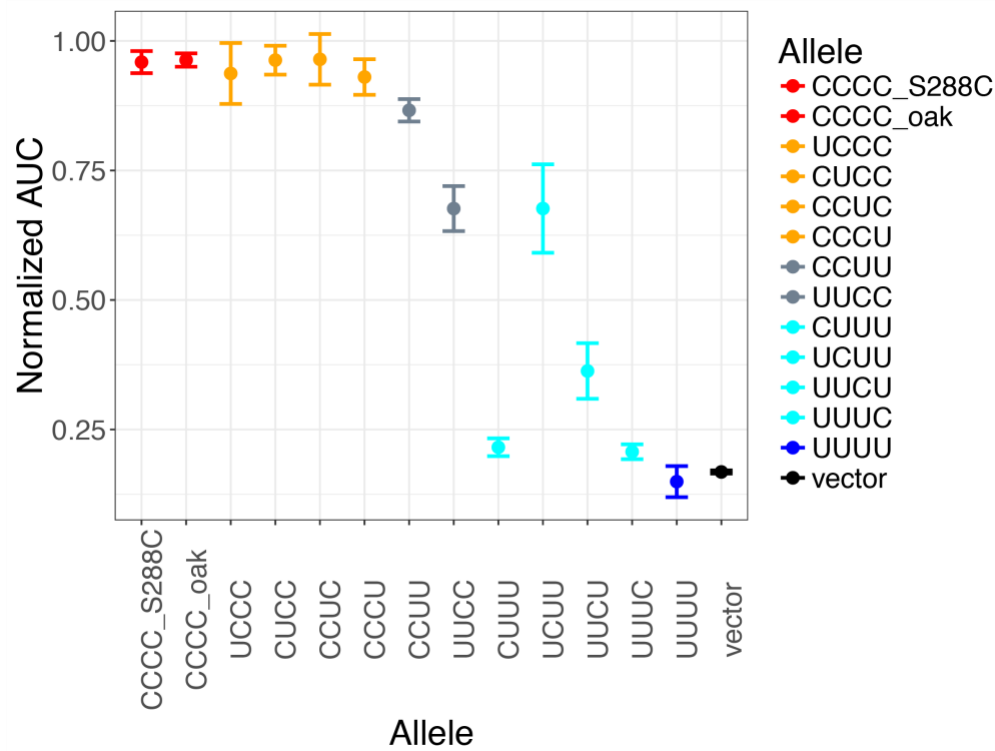

**Figure S1. Copper resistance of chimeric constructs in *S. cerevisiae*.** Copper resistance of the chimeras was examined in an *S. cerevisiae* *CUP2* knockout strain in 0.5 mM copper sulfate. Resistance was measured by normalized area under the curve (AUC), with points representing the mean of three biological replicates and error bars representing 95% confidence interval. The colors are based on the number of *S. cerevisiae* segments in the chimeras (red = 4, orange = 3, grey = 2, light blue = 1, blue or black = 0).
